# Supplementary material for: Genomic Analysis of Third Generation Cephalosporin Resistant Escherichia coli from Dairy Cow Manure
Source: Vet Sci. 2017 Nov 17;4(4):57. doi: 10.3390/vetsci4040057 (PMC5753637; doi:10.3390/vetsci4040057)
Supplement: Supplementary file 1 [file vetsci-04-00057-s001.xlsx]

## Sheet: AST-table
Table S 1: Antibiotic susceptibility and resistance gene profiles.
							Antibiotic susceptibility profiles																							Antibiotic Resistant gene profiles
							AMC	TIO	CRO	CIP	AMP	FOX	GEN	AZM	NAL	STR	SXT	CHL	SUL	TET
						Serotype	I				II							II			β-Latamase						Quinolone			Aminoglycosides	Phenicols			Trimethoprim			Sulfamides		Tetracyclines			Multi-drugs efflux pumps
box	Inv	Source	Colour	Week	Date Read	E. coli	Amoxicillin-calvulanic	Ceftiofur	Ceftriaxone	Ciprofloxacin	Ampicillin	Cefoxitin	Gentamicin	Azithromycin	Nalidixic acid	Streptomycin	Trimethoprim-sulphamethoxazole	Chloramphenicol	Sulfisoxazole	Tetracycline	CMY-2	CTX-M115	CTX-M-15	TEM-1	TEM-81	OXA-1	EgyrA mut	parC	qnrS1	aadA-17	floR	cat	cat1	dfrA12	dfrA14	dfrA5	sul1	sul2	tetA	tetD	tetG	marR mut	soxR mut	pmrE	acrF	emrB	emrE	mdtF	mphA
82	5883	C3T1-1	P1	4	2017-05-26 12:29:18	O8:H1	= 32 R	= 8 R	= 8 R	<=0.015	>32 R	>32 R	=0.5	= 1	= 2	> 64 R	> 4 R	>32 R	>256 R	= 32 R	1									1	1			1			1	1			1	1		1		1	1
87	6297	C3T1-2	P3	8	2017-05-26 12:15:28	O8:H1	= 32 R	= 8 R	= 16 R	<=0.015	>32 R	>32 R	=0.5	= 2	= 2	> 64 R	> 4 R	>32 R	>256 R	>32 R	1									1	1			1			1	1			1	1		1		1	1
82	5889	C3T1-2	P1	4	2017-05-26 12:13:32	O8:H1	= 32 R	= 8 R	= 16 R	<=0.015	>32 R	>32 R	=0.5	= 1	= 2	> 64 R	> 4 R	>32 R	>256 R	>32 R	1									1	1			1			1	1			1	1		1		1	1
83	5937	C3T1-2	P2	8	2017-05-26 12:04:15	O8:H1	> 32 R	> 8 R	= 16 R	<=0.015	>32 R	> 32 R	=0.5	= 2	= 2	> 64 R	> 4 R	>32 R	>256 R	>32 R	1									1	1			1			1	1			1	1		1		1	1
83	5945	C4T1-1	P2	8	2017-05-26 12:20:52	O9:NM	> 32 R	> 8 R	= 16 R	<=0.015	>32 R	>32 R	=0.5	>16	= 2	= 32 R	> 4 R	>32 R	>256 R	>32 R	1			1						1	1			1			1	1			1			1		1	1		1
83	5956	C4T1-3	P1	8	2017-05-26 12:09:27	O9:NM	> 32 R	> 8 R	= 16 R	<=0.015	>32 R	>32 R	= 1	= 4	= 4 S	> 64 R	> 4 R	>32 R	>256 R	>32 R	1									1	1			1			1	1			1	1				1	1
83	5953	C4T1-2	P1	8	2017-05-26 12:22:00	O9:NM	> 32 R	> 8 R	= 16 R	<=0.015	>32 R	>32 R	=0.5	= 4	= 2	= 4 S	<= 0.12	= 4 S	<= 16 S	<= 4 S	1																							1		1	1
82	5891	C3T1-3	P1	4	2017-05-26 12:01:41	O11:H25	= 32 R	= 8 R	= 16 R	<=0.015	>32 R	>32 R	=0.5	= 1	= 2	> 64 R	> 4 R	>32 R	>256 R	= 32 R	1									1	1			1			1	1			1	1	1	1		1	1
82	5901	C4T1-3	P1	4	2017-05-26 12:27:49	O20:NM	> 32 R	= 8 R	= 8 R	<=0.015	>32 R	= 32 R	=0.5	= 2	= 2	> 64 R	= 0.25	>32 R	>256 R	>32 R	1										1							1			1	1						1
82	5902	C4T1-3	P1	4	2017-05-26 12:26:48	O20:NM	> 32 R	= 8 R	= 8 R	<=0.015	>32 R	=32 R	=0.5	= 4	= 2	> 64 R	= 0.25	>32 R	>256 R	>32 R	1										1							1			1	1						1
83	5949	C4T1-2	P3	8	2017-05-26 12:11:40	O25:H11	= 8 S	> 8 R	= 64 R	<=0.015	>32 R	= 4 S	=0.5	= 2	= 2	> 64 R	=0.25	>32 R	>256 R	>32 R			1	1							1							1			1	1		1		1
83	5951	C4T1-2	P2	8	2017-05-26 12:08:10	O25:H11	= 8 S	> 8 R	> 64 R	<=0.015	>32 R	= 8 S	=0.5	= 4	= 4 S	> 64 R	= 0.25	>32 R	>256 R	>32 R			1	1							1							1			1	1		1		1
83	5936	C3T1-2	P1	8	2017-05-26 12:25:16	O151:H9	= 32 R	> 8 R	> 64 R	> 4 R	>32 R	= 32 R	=0.5	= 2	> 32 R	> 64 R	> 4 R	>32 R	>256 R	>32 R			1	1			1	1	1		1				1			1			1			1	1	1		1
83	5944	C4T1-1	P1	8	2017-05-26 12:06:09	O153:H42	= 8 S	> 8 R	> 64 R	<=0.015	>32 R	= 8 S	=0.5	> 16	= 1	> 64 R	> 4 R	>32 R	>256 R	>32 R		1			1					1			1	1			1	1	1	1		1	1	1					1
83	5947	C4T1-1	P1	8	2017-05-26 12:10:33	O153:H42	= 8 S	> 8 R	= 32	<=0.015	>32 R	= 8 S	=0.5	=16	= 1	> 64 R	> 4 R	>32 R	>256 R	>32 R		1			1					1			1	1			1	1	1	1		1	1	1					1
83	5950	C4T1-2	P1	8	2017-05-26 12:24:10	O83:42	= 32 R	> 8 R	= 32	= 0.5	>32 R	= 32 R	= 1	>16	> 32 R	> 64 R	<= 0.12	>32 R	<= 16 S	= 32 R			1	1		1						1									1	1	1	1					1
83	5959	C4T1-3	P1	8	2017-05-26 12:18:36	O7:H8	> 32 R	= 8 R	= 16 R	<=0.015	>32 R	>32 R	=0.5	= 2	= 2	= 4 S	<= 0.12	= 4 S	<= 16 S	<= 4 S	1																					1		1		1	1
87	6294	C4T1-1	P3	8	2017-05-26 12:17:05	O33:H23	= 8 S	> 8 R	= 64 R	<=0.015	>32 R	= 2 S	=0.5	= 2	= 2	> 64 R	> 4 R	=8 S	>256 R	>32 R			1	1												1		1			1	1	1	1		1	1
[truncated: 2 more columns]
